# Supplementary material for: Ensemble models from machine learning: an example of wave runup and coastal dune erosion
Source: Copernicus journal article supplement (doi:10.5194/nhess-2019-81), 2019-04-02
Supplement: Supplementary file [file nhess-2019-81-AC1-supplement.pdf]

**“Ensemble models from machine learning: an example of wave runup and coastal dune erosion”**

**Response to Reviewers**

We thank both Reviewers for their time and effort in providing constructive feedback on our manuscript. Their comments have led to a much-improved manuscript with greater clarity in the description and purpose of the work presented. Below is our point-by-point response to the comments made and details of where the related changes have been made in the revised manuscript, in which they have also been highlighted. For clarity, Reviewer comments have been separated into key points which are addressed individually.

**REVIEWER 1**

**Comment 1:**

*“My main concern is that the authors neglect to discuss the limitations of their methodology. For example, the authors’ state that machine learning models perform poorly when forced to extrapolate a prediction, and that it is important to use training data sets that capture the full range of variability of the data. While the authors use training data from a year, this may not account for interannual variability of the wave climate and long-term trends or shifts in storm tracks and intensities. The authors should discuss how representative the year of training data is of past years, wave climate-wise, or other years of measurements, runup-wise, as well as the precautions in a limited set of training data. Furthermore, rare, extreme events may not have occurred during that particular year. This is often also one of the issues with deterministic/empirical parameterizations of the R2% from field studies – that extreme conditions haven’t been captured.”*

**Author Response to Comment 1:**

The June 2011 storm event used in the testing phase of this manuscript (Sect. 4.2) lies within the range of the one-year training dataset used to develop the GP runup predictor, so extrapolation is not an issue in the work presented. New Lines 401 – 403 have been added to the manuscript to clarify this:

*“As can be seen in Fig. 6 the wave conditions for the June 2011 storm lie within the range of the training dataset used to develop the GP runup predictor.”*

However, the Reviewer raises the important issue that capturing the full range of variability in a dataset used to train a GP, or any machine learning model can be difficult, especially when considering longer-term trends and a potentially changing wave climate in the future. This limitation has now been clarified in the manuscript at Lines 564 – 569:

*“However, as discussed in Sect. 2.3, when developing a GP, or any machine learning model, the training data should include the full range of possible variability in the data to be modelled in order to avoid extrapolation. A limitation of using this data-driven approach for runup prediction is that it can be difficult to acquire a training dataset that capture all possible variability in the system, from, for example, longer-term trends, extreme events or a potentially changing wave climate in the future (Semedo et al., 2012).”*

**Comment 2:**

*“On that note, the authors seem to suggest in their discussion that this technique is more reliable than Monte Carlo techniques because the uncertainty is learned directly from data. Monte Carlo techniques however, seek to represent conditions that haven’t necessarily occurred by modeling large sets of physically plausible conditions. Both the GP and MC techniques seem equally useful, with different motivations.”*

**Author Response to Comment 2:**

We agree with the Reviewer that both GP and MC techniques have differing applications and advantages/limitations. It was not the intention of the manuscript to argue that GP is better than MC but simply to illustrate the GP approach and how it can be applied to coastal process prediction. We have made wording changes to clarify this at:

Lines 561 – 562:

*“While alternative approaches are available for generating probabilistic predictions, such as Monte Carlo simulations (e.g., Callaghan et al., 2013), the GP approach offers a method of deriving uncertainty explicitly from data...”*

Line 607 – 608:

*“As discussed earlier in Sect. 4.3, the GP approach differs to Monte Carlo in that it explicitly quantifies uncertainty directly from data, does not use deterministic equations, and can be computationally efficient.”*

**Comment 3:**

*“Following on, there is no adequate discussion of the model’s poor prediction for large erosion events seen in Figure 8 between profiles 28 -34. The authors suggest that the under-prediction of large erosion events could be due to a non-optimized  $C_s$  parameter, stating that, “. . .increasing  $C_s$  would lead to better mean ensemble predictions of  $C_2$  the large dune erosion volumes but over-prediction of the smaller events.” Does this mean that the optimum  $C_s$  within table 1 for each ensemble grouping captured erosion over this set of profiles better? Is it more important to weight the mean or extreme conditions? Then, in Lines 534-535, “the results demonstrate the ensemble approach is less sensitive to the choice of  $C_s$  than a deterministic model so it can be useful for forecasting with non-optimized model parameters”. So on one hand, they suggest that erosion can be better predicted with an optimized  $C_s$ , and on the other hand it will be useful for forecasting with non-optimized model parameters. Can the authors please expand on these seemingly contradictory statements?”*

**Author Response to Comment 3:**

The Reviewer is correct that the  $C_s$  value used in Fig. 8 is non-optimized (it is an assumed value of  $1.5 \times 10^{-3}$ , the point being that we often would not know the optimum  $C_s$  value in advance, particularly in a forecasting scenario), and that the  $C_s$  values in Table 1 are the actual optimized values which would fit this dataset better. Of course, the best prediction will always be achieved with an optimized  $C_s$ . However, because this optimum value cannot be known in advance, we are demonstrating here how a GP can provides useful insights about uncertainty even when based on a non-optimized  $C_s$ . This key point has been clarified with changes to Lines 480 – 487:

*“It should be noted that the results presented in Fig. 8 are based on an assumed (i.e., non-optimized)  $C_s$  value of  $1.5 \times 10^{-3}$ . Better prediction of large erosion events could potentially be achieved by increasing  $C_s$  or giving greater weighting to these events during calibration, but at the cost of over-predicting the smaller events. The exact effect of varying  $C_s$  is quantified in Sect. 4.3. Importantly, Fig. 8 demonstrates that even with a non-optimized  $C_s$ , uncertainty in the GP predictions can provide useful information about the potential for dune erosion, even if the mean dune erosion prediction deviates from the observation; a key advantage of the GP approach over a deterministic approach.”*

**Comment 4:**

*“In Figure 8, there are some points that fall well outside of the range of uncertainty in erosion measurements. The authors state that, “regardless of the value of  $C_s$  chosen, an advantage of the GP approach is that uncertainty in GP predictions can give an indication of dune erosion, even if the mean dune erosion prediction deviates from the observations. “ While there is truth to this statement, there are locations where the uncertainty does not characterize the observations at all, and this should be discussed.”*

**Author Response to Comment 4:**

It is true that some of the dune erosion observations in Fig. 8 fall outside the range of uncertainty predicted by the GP (Profiles 29, 30 and 33). This is most likely due to the non-optimized  $C_s$  value used and/or inadequacies in the GP runup model or L04 dune erosion model. However, as stated in Lines 494 – 495, the range of ensemble predictions output by the GP at these particular profiles is also very large (much larger than then the range of ensemble predictions at Profiles 1 – 26), which is indicative of high uncertainty in predictions and the potential for high erosion to occur at these profiles. While the model is clearly not perfect, the idea is that using the GP runup predictor provides a useful indication of uncertainty in predictions – which is an advantage over the point prediction a deterministic approach would provide. Words to this effect have now been included in Lines 476–487:

*“In contrast, the ensemble mean can be seen to under-predict dune erosion at profiles where high erosion volumes were observed (profiles 29 – 34 in Fig. 8) with some profiles not even captured by the uncertainty of the ensemble. However, the ensemble range of predictions for these particular profiles also has a large spread, indicative of high uncertainty in predictions and the potential for high erosion to occur... Importantly, Fig. 8 demonstrates that even with a non-optimized  $C_s$ , uncertainty in the GP predictions can provide useful information about the potential for dune erosion, even if the mean dune erosion prediction deviates from the observation; a key advantage of the GP approach over a deterministic approach.”*

**Comment 5:**

*“Furthermore, I understand that the main contribution of the paper is the ensemble technique for modeling wave runup rather than the erosion model calibration, however I found the sections focused on the transport coefficient,  $C_s$ , to break up the flow of the manuscript. Specifically, the section describing previous research on  $C_s$  (Lines 415 – 440) can be shortened and put into an appendix or supplemental information so the reader can focus instead on the results. I felt the most important information in this section was what  $C_s$  value was being used, how much it ranged, and specifically Lines 430 – 440.”*

**Author Response to Comment 5:**

We acknowledge the Reviewer's request to shorten old Lines 415 – 440 (new Lines 420 – 445). However, we feel that the information regarding  $C_s$  is important for contextualizing the study and would prefer to leave it in the main body of the text. We would be happy to move this information to an Appendix but will leave the decision to the discretion of the Editor.

**Comment 6:**

*“Additionally, the results that appear in the discussion section (section 5.2) could be moved to the end of the results section. While these results are important for weighing the importance of  $C_s$ , they felt out of place in the discussion section.”*

**Author Response to Comment 6:**

We agree with the Reviewer that moving Section 5.2 to the results section would improve the flow of the manuscript. As such, **Sect. 5.2 in the original manuscript has now been moved to new Sect. 4.3** in the revised manuscript.

**Comment 7:**

*“Finally, this manuscript left me wondering what type of applicability this has to other locations. For example, is this method limited to locations with data?”*

**Author Response to Comment 7:**

This is a great question from the Reviewer and it is the topic of future work to determine how generalizable the runup predictor is and if site-specific data is required to apply the predictor to other locations, as now stated in **Lines 637 – 638**.

*“Future work is focused on using more data and additional inputs, **such as offshore bar morphology and wave spectra**, to improve the GP runup predictor developed here, **testing it at different locations and integrating it into a real-time coastal erosion forecasting system.**”*

**Comment 8:**

*“Lines 294 – 295: The authors may want to consider citing the technical methods for extracting wave runup as this is not a trivial task.”*

**Author Response to Comment 8:**

Wave runup was extracted using a neural network runup tracking tool developed at Narrabeen Beach and which is available on GitHub. We are in the process of preparing a citable DOI for this package (Simmons et al. (2019)) and will include it in the final version of this manuscript during the proofing stage, before publication, on **Lines 296–297**:

*“Individual wave runup elevation on the beach profile was extracted on a wave-by-wave basis from the LIDAR dataset (Fig. 2C) **using the neural network runup detection tool developed by Simmons et al. (2019).**”*

**Comment 9:**

“Lines 392 – 393: What is the resolution of SWAN model? 10m?”

**Author Response to Comment 9:**

The SWAN model is based on a 10 m resolution grid. This has now been clarified in the manuscript at Lines 305 – 306:

“...using a pre-calculated look-up table generated with the SWAN spectral wave model based on a 10 m resolution grid...”

**Comment 10:**

“Figure 3: Why is the wave runup histogram plotted in red?”

**Author Response to Comment 10:**

The wave runup histogram was originally plotted in red to identify it as the response variable in the GP mode. However, Fig. 3 has now been modified so that the wave runup histogram matches the color of the input variables:

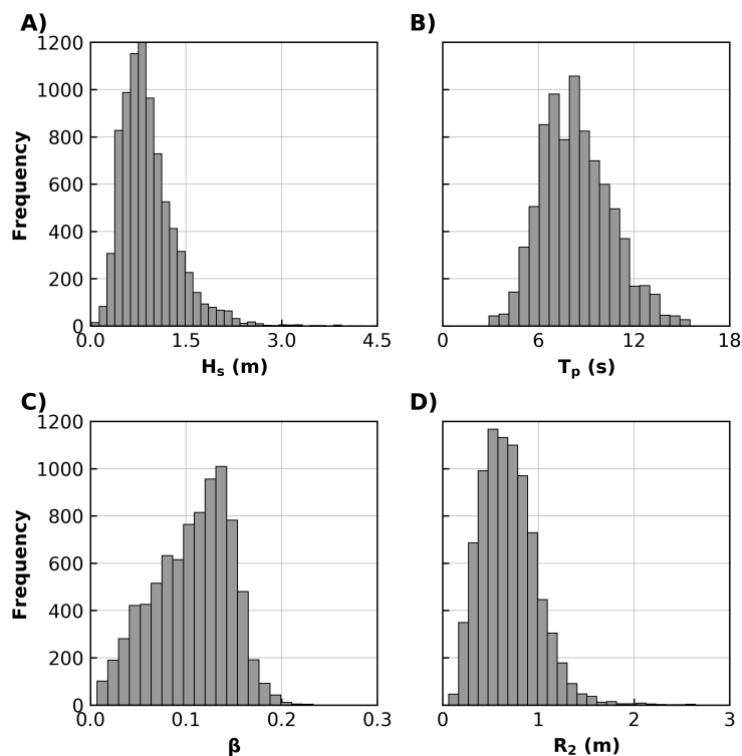

Fig. 3: Histograms of the 8328 data samples extracted from the Narrabeen LIDAR: (A) significant wave height ( $H_s$ ); (B) peak wave period ( $T_p$ ); (C) beach slope ( $\beta$ ); and, (D) 2% wave runup elevation ( $R_2$ ).

**Comment 11:**

“Does the blue display the runup prediction or the total water level prediction? It looks to me like there are tides within the blue values. Also, is it possible to plot some of the wave runup data on 7a? Authors show observations of erosion and dune toe, however, their model is predicting wave runup so that would be interesting to see in the time series sense too.”

**Author Response to Comment 11:**

The Reviewer is correct that the blue on Fig. 7 displays the total water level predictions (i.e., runup + water level). This is to illustrate how the dune erodes as the water level exceeds the dune toe in the L04 model. However, we agree with the Reviewer that it would be useful to see an example of just the wave runup prediction of the GP. Fig. 7 has now been modified to include this information:

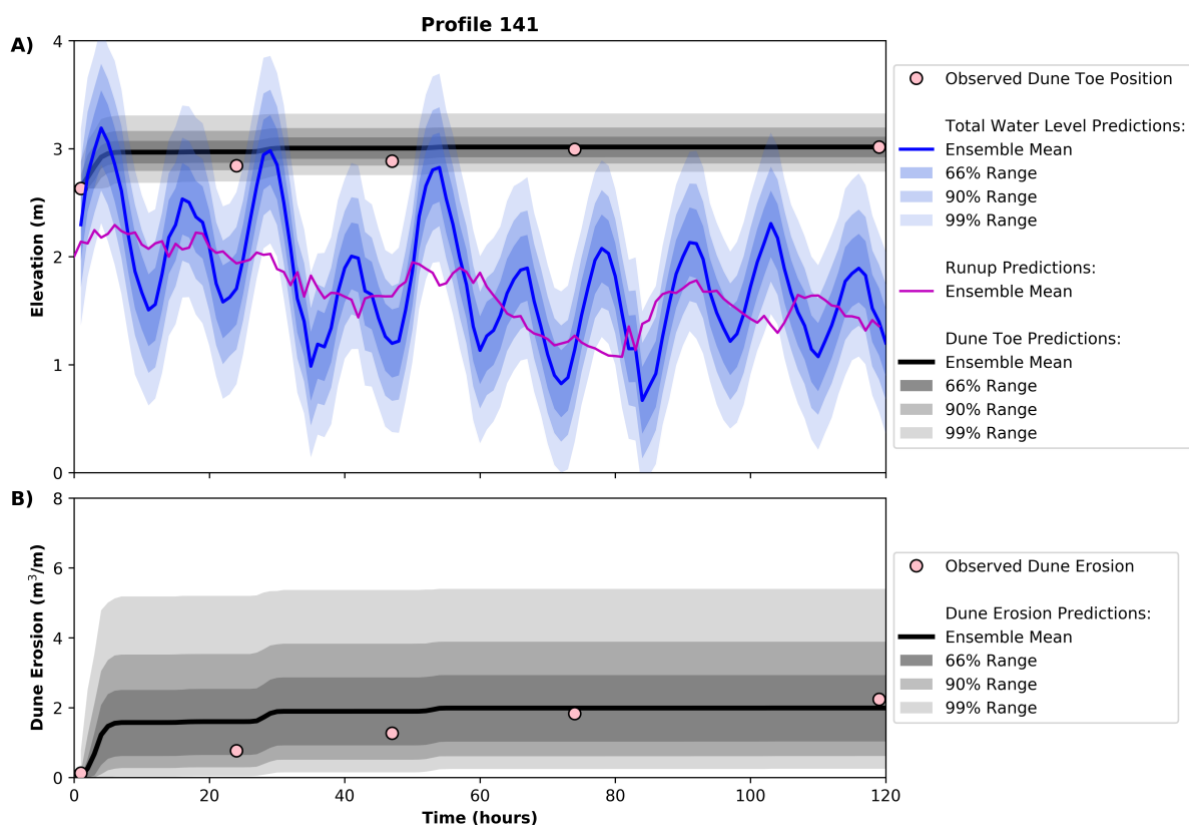

**Fig. 7:** Example of LEH04 used with the Gaussian process  $R_2$  predictor to form an ensemble of dune erosion predictions. 10,000 runup models are drawn from the Gaussian process and used to force the LEH04 model. A) Total water level (measured water level +  $R_2$ ; blue) and dune toe elevation (grey) for the 120-hour storm event. Bold colored line is the mean of the ensemble and shaded areas represent the regions captured by 66%, 90% and 99% of the ensemble predictions. An example of just the  $R_2$  prediction (no measured water level) from the Gaussian process is shown in the magenta line. Pink dots denote the observed dune toe elevation throughout the storm event. B) The corresponding ensemble of dune erosion predictions.

**Comment 12:**

“Line 35: The authors use the term ‘significant wave period’ to describe the wave period variable in runup formulations and then later mostly use ‘peak wave period’. As ‘significant wave period’ is not used as typically, I’d recommend sticking with ‘peak wave period’ or simply ‘wave period’.”

**Author Response to Comment 12:**

This is a good pick-up by the Reviewer, the term “significant wave period” has been replaced by “Peak wave period” which is used throughout the rest of the manuscript.

**Comment 13:**

*“Line 285: Please define SSE acronym, and if not used again, no acronym is necessary.”*

**Author Response to Comment 13:**

This acronym has been replaced by south-southeast as it is not used again in the manuscript.

**Comment 14:**

*“Lines 446 – 447, Lines 509-510, Lines 545-546, Lines 595 – 596, Lines 619-620: repetition of similar variations of the following text, “drawing 10,000 samples takes than one second on a standard desktop computer.” I’d recommend the authors say this a few times, then perhaps the term “computationally efficient” as this felt repetitive to read 5 times.”*

**Author Response to Comment 14:**

This statement has now been removed from old Lines 545–546, 595–596, 619–620.
